# Supplementary material
Source: PubMed Central journal article supplement (PMC5069732)
Supplement: Supp_Figure2.pdf [file Supp_Figure2.pdf]

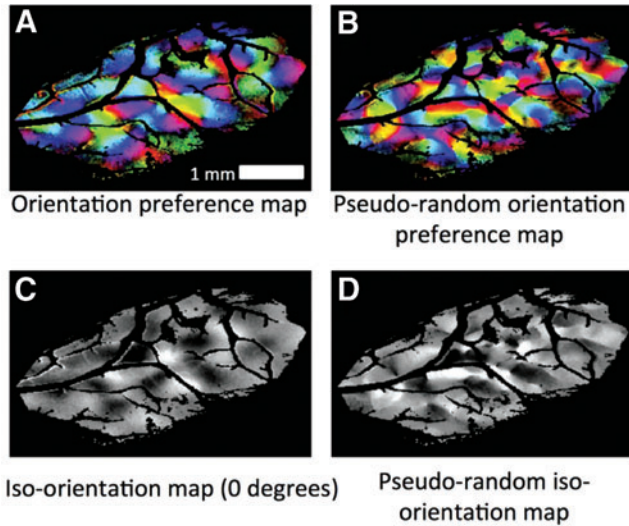

**SUPPLEMENTARY FIG. S2.** For each ferret, an orientation preference map (**A**) was generated from evoked datasets. An artificial map (**B**) was also used in analysis as a control. A mask was applied in both cases to exclude blood vessels and bone. IOMs representing the activation patterns for a single orientation were generated by taking the cosine of the orientation preference map (**C**). These maps were used as a reference for the spatial correlation analysis. Additional angles were tested by adding an appropriate phase shift to the sinusoid. Artificial IOMs (**D**) were also generated using the artificially generated orientation maps and used in analysis as a negative control. IOMs, iso-orientation maps.
